# Supplementary material for: Oxidative Stress-Induced Sirtuin1 Downregulation Correlates to HIF-1α, GLUT-1, and VEGF-A Upregulation in Th1 Autoimmune Hashimoto’s Thyroiditis
Source: MDPI journal article supplement (doi:10.3390/ijms22083806), 2021-04-07
Supplement: s1 [file s1]

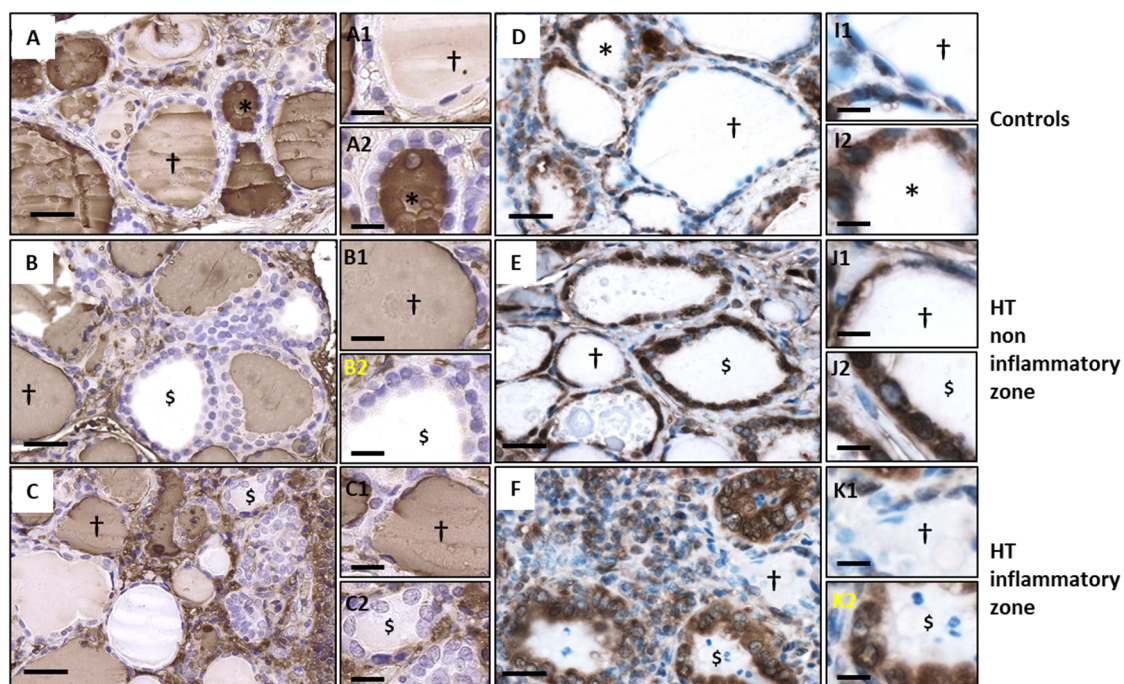

**Supplemental Figure 1.** Immunohistochemistry on parathyroid tissue obtained from multinodular goiter patients designated as controls (A; D) and thyroid tissues from HT patients (B,C,E and F). The pictures illustrate representative tissue samples of both conditions. In control thyroids, T4 was expressed in hypofunctional (†) and more intensively in active follicles (\*). HNE staining was low in hypofunctional and slightly higher in active follicles (\*) (D). In HT thyroids, in non-inflammatory and inflammatory zones, T4 was not detected in altered active-like follicles (\$) (B-C) which highly expressed HNE (E-F). (C-F) Scale bar = 50µm. (C1-H2) Scale bar = 20µm.
